# Supplementary material
Source: PubMed Central journal article supplement (PMC3154554)
Supplement: supp_00074.2011_legends.pdf [file supp_00074.2011_legends.pdf]

**Supplementary Figure 1. Schematic view of the culture system as used for model predictions and lid-resistance to oxygen mass transfer. (A)** The 3D HUVEC collagen gel culture comprises three individual layers: (i) collagen gel containing HUVECs (bottom layer), (ii) growth medium (middle layer), and (iii) air (top layer). **(B)** Oxygen measurements illustrate the additional resistance of the culture plate lid to the mass transfer of oxygen.

**Supplementary Figure 2. Small interfering RNA studies.** Real-time RT-PCR analysis of siRNA-transfected HUVECs shows significant suppression of HIF1 $\alpha$  or HIF2 $\alpha$  compared to controls (luciferase-transfected HUVECs). Significance levels were set at \* $p < 0.05$ , and \*\*\* $p < 0.001$ , respectively.

**Supplementary Figure 3. DPI-treated HUVECs in 3D collagen gel under hypoxic conditions.** We observed no tube formation when encapsulated HUVECs in 3D collagen gel were cultured in media containing DPI neither in **(A)** 2% O<sub>2</sub> nor **(B)** followed reoxygenation; image on the left; controlled DO levels mimicking the untreated case on the right. Fluorescence microscope images - phalloidin in green, nuclei in blue. Scale bar= 100  $\mu\text{m}$ .
