# Supplementary material
Source: PubMed Central journal article supplement (PMC3154554)

A

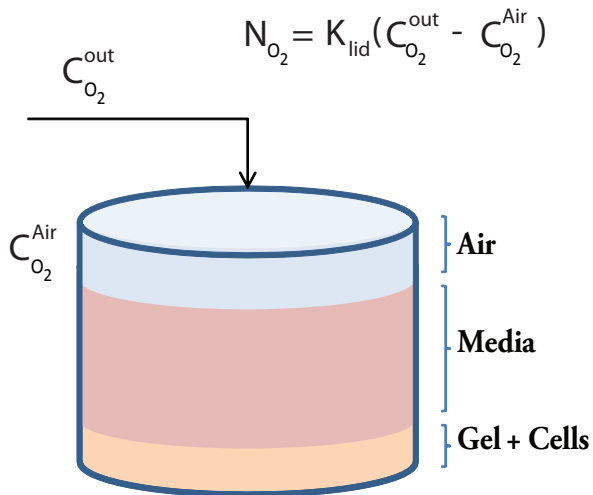

B

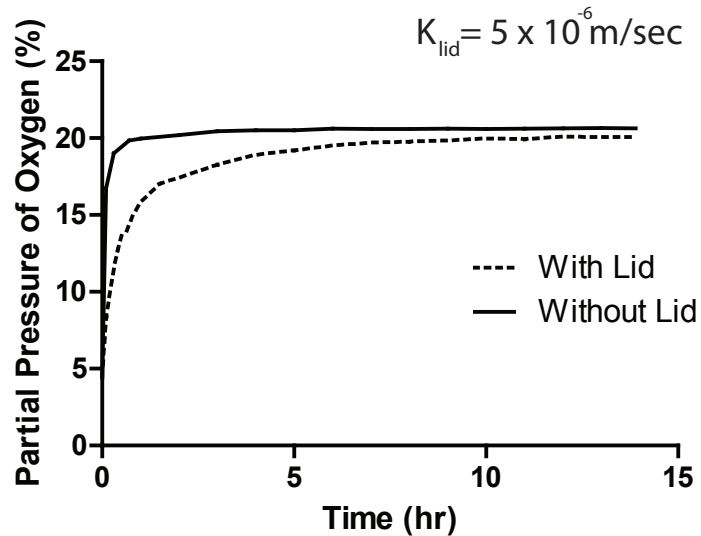

Supplement: supp_00074.2011_figS1.pdf [file supp_00074.2011_figS1.pdf]

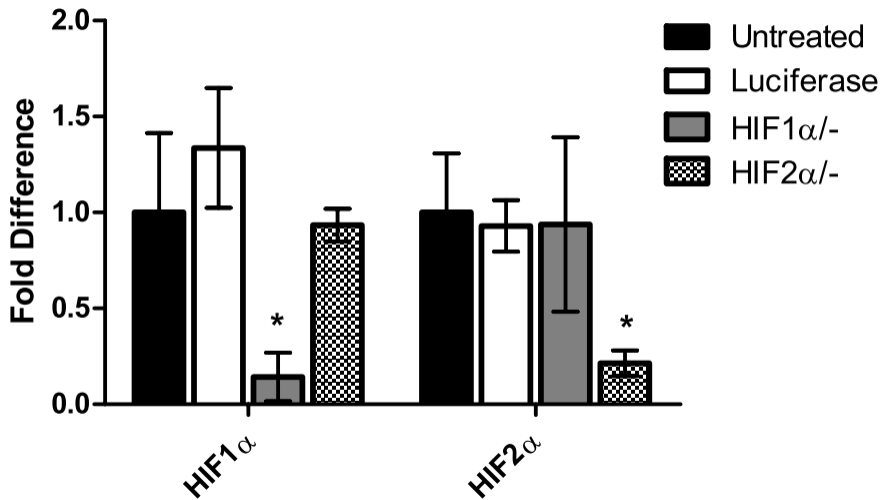

Supplement: supp_00074.2011_figS2.pdf [file supp_00074.2011_figS2.pdf]

A

DPI Treated at 2% O<sub>2</sub>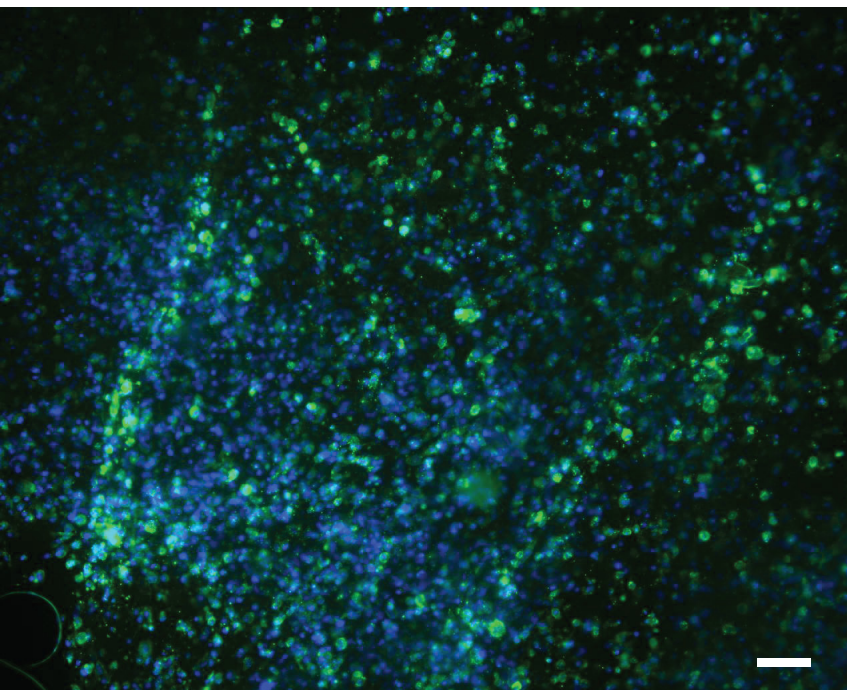

B

DPI Treated at 2% O<sub>2</sub> and Reoxygenation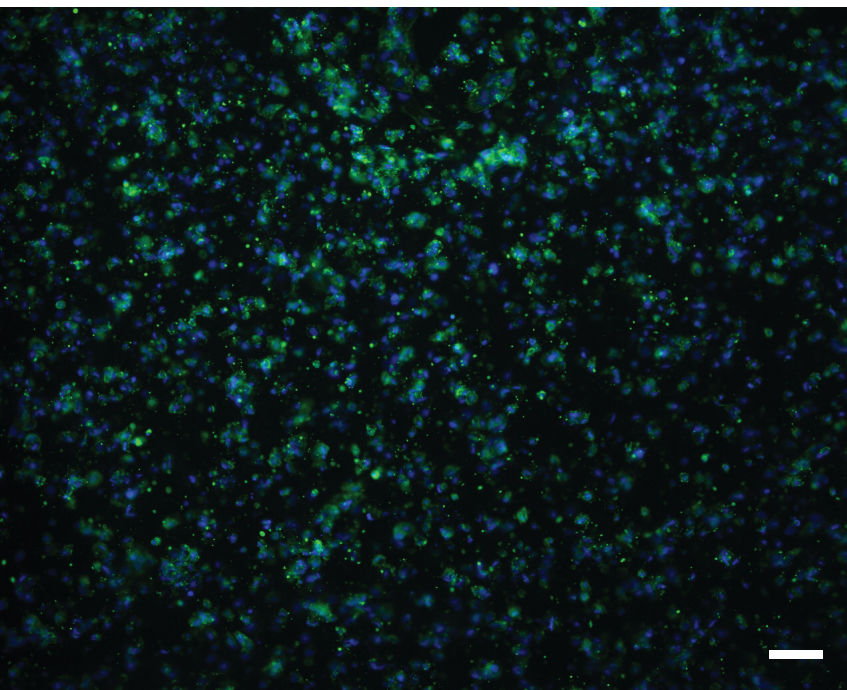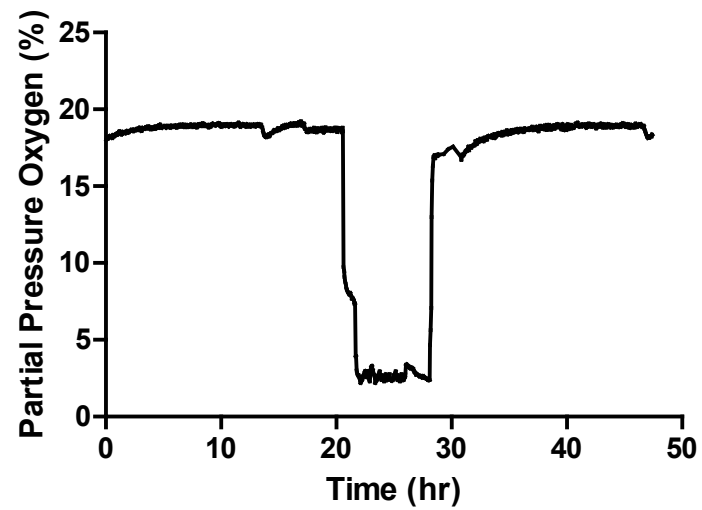

Supplement: supp_00074.2011_figs3.pdf [file supp_00074.2011_figs3.pdf]
